# Supplementary material for: Optimization of Pt(II) and Pt(IV) Adsorption from a Water Solution on Biochar Originating from Honeycomb Biomass
Source: MDPI journal article supplement (doi:10.3390/molecules29020547), 2024-01-22
Supplement: s1 [file s1]

# Optimization of Pt(II) and Pt(IV) Adsorption from a Water Solution on Biochar Originating from Honeycomb Biomass

Kinga Morlo <sup>1</sup>, Rafał Olchowski <sup>2</sup> and Ryszard Dobrowolski <sup>1,\*</sup>

<sup>1</sup> Department of Analytical Chemistry, Institute of Chemical Sciences, Faculty of Chemistry,  
Maria Curie-Skłodowska University, M. C. Skłodowska Sq. 3, 20-031 Lublin, Poland;  
kinga.morlo1@gmail.com

<sup>2</sup> Department of Pharmacology, Toxicology and Environmental Protection, Faculty of Veterinary Medicine, University of Life Sciences, Akademicka Sq. 12, 20-950 Lublin, Poland; rafal.olchowski@up.lublin.pl

\* Correspondence: rdobrow@poczta.umcs.lublin.pl

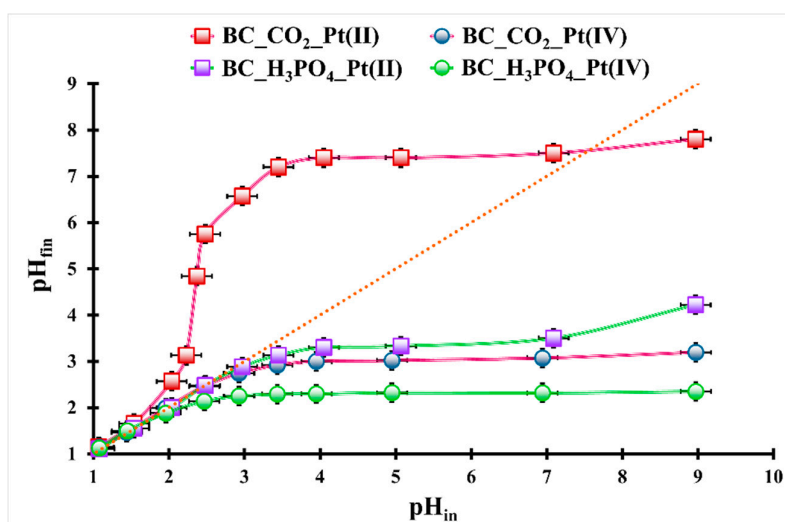

**Figure S1.** The  $\text{pH}_{\text{fin}}$  in the function of the  $\text{pH}_{\text{in}}$  for studied adsorption systems (Pt(II):  $m = 35$  mg,  $V = 5$  mL,  $t = 7$  days,  $C_0 = 159$  mg  $\text{L}^{-1}$ ; Pt(IV):  $m_{\text{BC\_CO}_2} = 20$  mg,  $m_{\text{BC\_H}_3\text{PO}_4} = 25$  mg,  $V = 5$  mL,  $t = 7$  days,  $C_0 = 195$  mg  $\text{L}^{-1}$ )

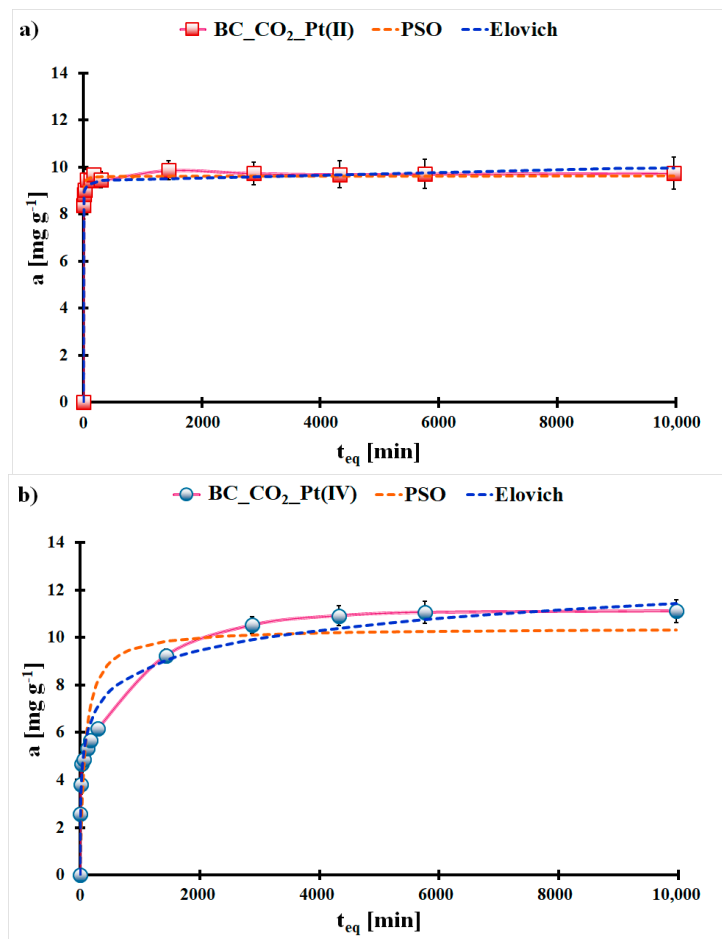

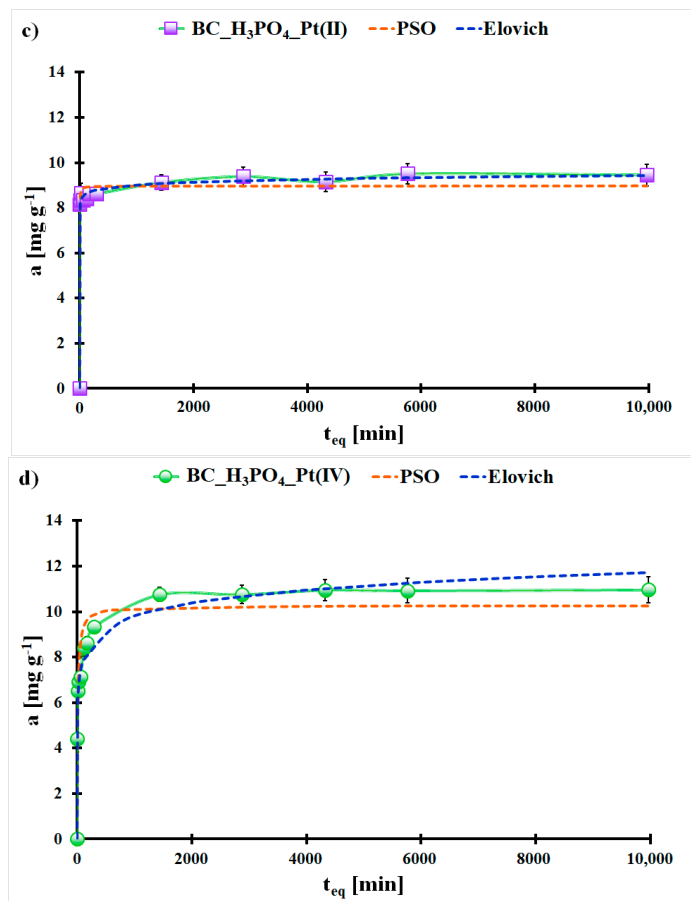

**Figure S2.** The experimental Pt(II) and Pt(IV) adsorption kinetics data fitted to the theoretical pseudo-second-order and Elovich models for a) BC\_CO<sub>2</sub>\_Pt(II), b) BC\_CO<sub>2</sub>\_Pt(IV), c) BC\_H<sub>3</sub>PO<sub>4</sub>\_Pt(II) and d) BC\_H<sub>3</sub>PO<sub>4</sub>\_Pt(IV) (m<sub>biochar</sub> = 20 mg, V<sub>sol.</sub> = 5 mL, C<sub>0\_Pt(II)</sub> = 38.8 mg L<sup>-1</sup>, C<sub>0\_Pt(IV)</sub> = 46.5 mg L<sup>-1</sup>, T = (20 ± 4)°C), error bars denote standard deviations for 3 repeats)

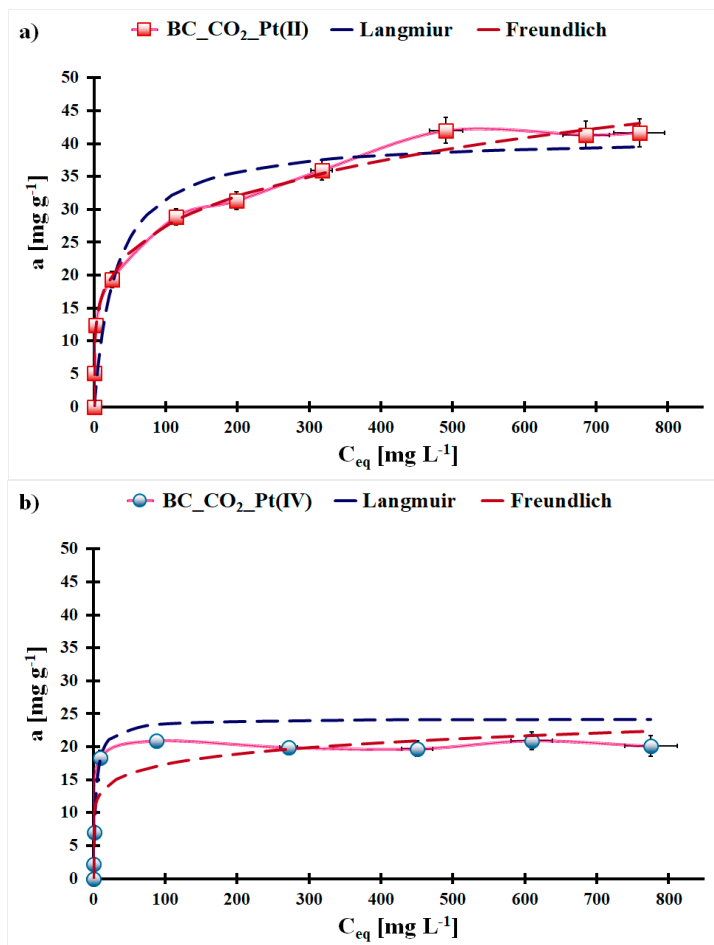

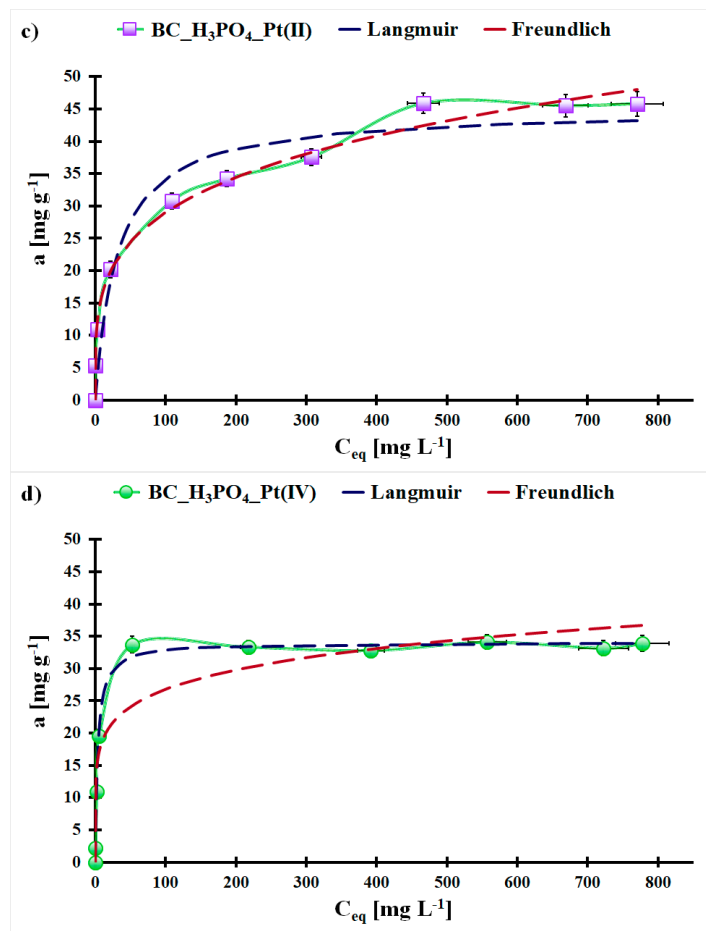

**Figure S3.** The experimental Pt(II) and Pt(IV) adsorption isotherms data fitted to the theoretical Langmuir and Freundlich models for a) BC\_CO<sub>2</sub>\_Pt(II), b) BC\_CO<sub>2</sub>\_Pt(IV), c) BC\_H<sub>3</sub>PO<sub>4</sub>\_Pt(II) and d) BC\_H<sub>3</sub>PO<sub>4</sub>\_Pt(IV) (m<sub>biochar</sub> = 20 mg, V<sub>sol.</sub> = 5 mL, pH<sub>0</sub> = 1.5, t<sub>eq</sub> = 7 days, T = (25 ± 4) °C), error bars denote standard deviations for 3 repeats
